# Supplementary material
Source: publisher site journal article supplement (https://www.dovepress.com/article/377901)
Supplement: Supplementary file 1 [file get_supplementary_file.php]

**Table S1 Factor-loading matrix for the four dietary patterns and their food or food groups**

|                                                    | High-salt and<br>high-oil pattern | Western pattern | Grain-vegetable<br>pattern | Junk food<br>pattern |
|----------------------------------------------------|-----------------------------------|-----------------|----------------------------|----------------------|
| Grains (rice, flour, and coarse cereals,<br>etc.)  | -0.02                             | 0.00            | 0.41                       | -0.04                |
| Potatoes (potato, taro, and sweet<br>potato, etc.) | 0.01                              | 0.25            | 0.04                       | 0.20                 |
| Meat (pork, beef, mutton, chicken,<br>duck, etc.)  | 0.07                              | 0.41            | 0.21                       | 0.08                 |
| Fish (fish, shrimp, crab, etc.)                    | 0.04                              | 0.18            | 0.08                       | 0.10                 |
| Vegetable (light- and dark-colored<br>vegetables)  | -0.03                             | 0.13            | 0.58                       | -0.06                |
| Fruit (apple, banana, etc.)                        | 0.03                              | 0.40            | 0.18                       | 0.11                 |
| Egg                                                | 0.02                              | 0.36            | -0.09                      | 0.12                 |
| Milk                                               | 0.07                              | 0.37            | -0.07                      | 0.11                 |
| Legumes (soybean, mung, etc.)                      | 0.03                              | 0.51            | 0.05                       | 0.06                 |
| Fried food (seedcake, deep-fried dough             | 0.02                              | 0.17            | -0.02                      | 0.18                 |



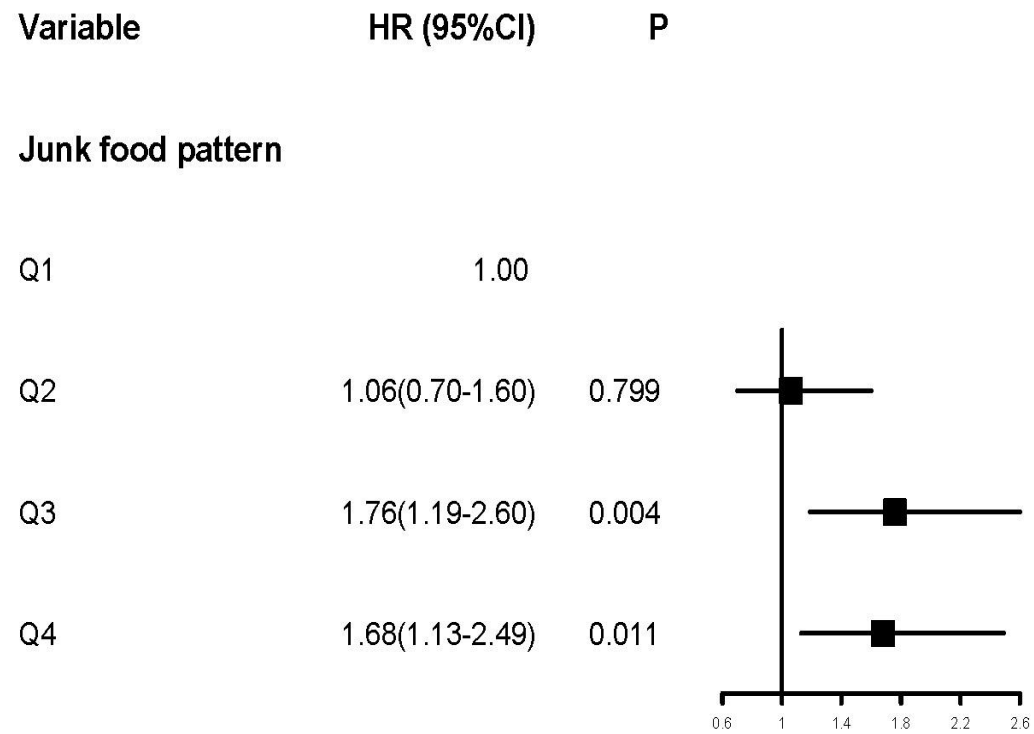

**Figure S1 Sensitivity analysis after excluding participants with overweight at baseline**

**Note:** Q1, quartile 1 (lowest); Q2, quartile 2; Q3 quartile 3; Q4, quartile 4 (highest).

HR, hazard ratio; 95%CI, 95% confidence interval.
